# Supplementary material for: Speculations on the application of foliar 13 C discrimination to reveal groundwater dependency of vegetation, provide estimates of root depth and rates of groundwater use
Source: Copernicus journal article supplement (doi:10.5194/hess-2017-540), 2017-10-05
Supplement: Supplementary file 1 [file hess-2017-540-supplement.pdf]

## Supplementary material

**Table S1: Site Characteristics**

Name, latitude, longitude, mean annual precipitation, mean annual temperature and biome descriptions for SuperSites studied across the continent. Long-term average climate data were obtained from the WorldClim database.

| Site / Abbreviation                 | Lat<br>° | Long<br>° | MAP<br>(mm) | MA<br>T<br>(°C) | Biome /<br>Abbreviation                     |
|-------------------------------------|----------|-----------|-------------|-----------------|---------------------------------------------|
| Calperum Mallee /CM                 | -34.0373 | 140.6738  | 255         | 17.3            | Semi-arid<br>woodland / SW                  |
| Great Western Woodlands / GWW       | -30.2640 | 120.6917  | 273         | 18.5            | Temperate<br>woodland /TW                   |
| Alice Mulga                         | -22.2828 | 133.2493  | 321         | 22.4            | Semi-arid tropical<br>savanna / STS         |
| Cumberland Plain                    | -33.6190 | 150.7382  | 900         | 17.7            | Temperate<br>woodland / TW                  |
| Warra Tall Eucalypt                 | -43.0888 | 146.6512  | 1474        | 10.1            | Temperate wet<br>forest / TWF               |
| Litchfield Savanna*                 | -12.4853 | 131.1461  | 1714        | 27.8            | High rainfall<br>tropical savanna /<br>HTS  |
| FNQ - Cape Tribulation <sup>†</sup> | -16.1000 | 145.4500  | 2087        | 25.2            | Lowland wet<br>tropical rainforest /<br>LTR |
| FNQ - Robson Creek <sup>†</sup>     | -17.1195 | 145.6323  | 2140        | 21.0            | Upland wet tropical<br>rainforest /UTR      |

\*Data from Cernusak *et al.* (2011) for Howard Springs is used as a representative of Litchfield Savanna site. <sup>†</sup>Data are collected from two nodes for the Far North Queensland (FNQ) rainforests SuperSites.

**Transect - 1**

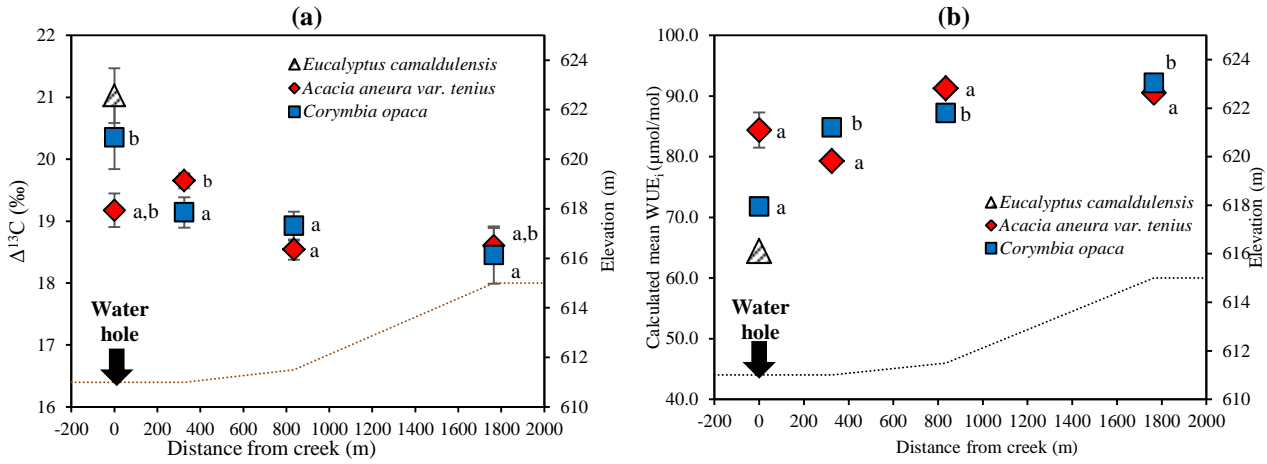

**Transect - 2**

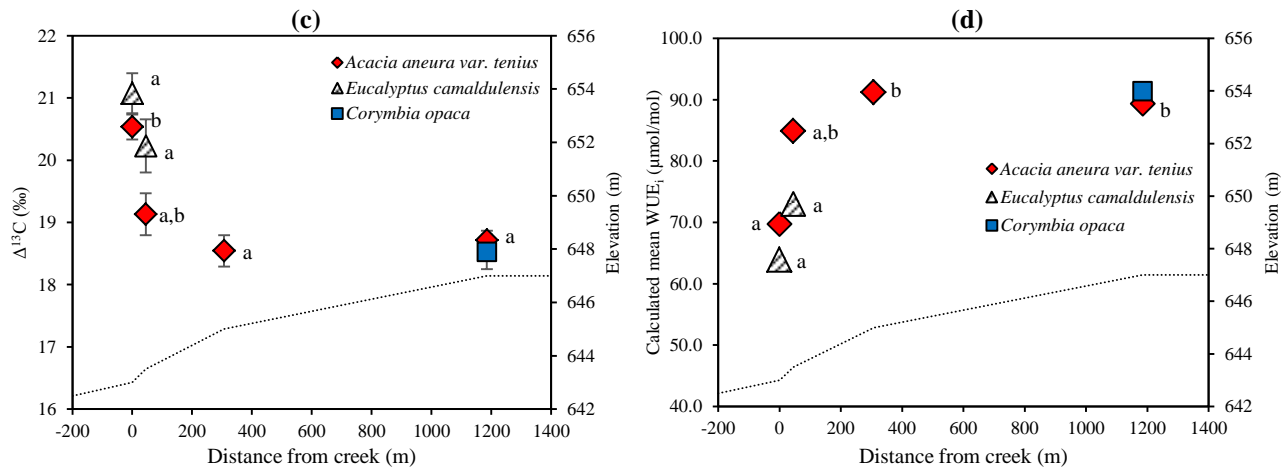

**Transect - 3**

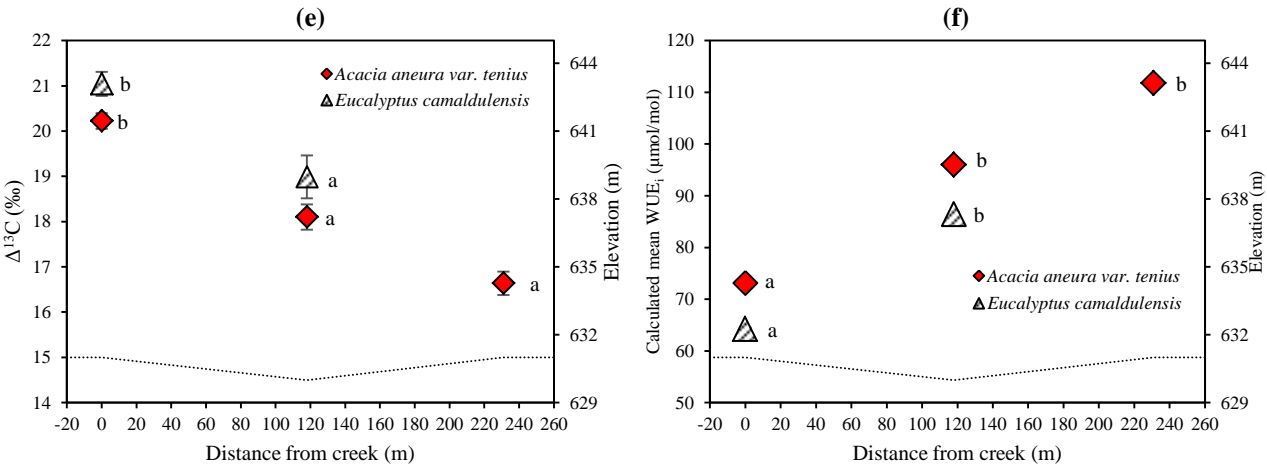

**Figure S1:** Cross sections (dotted lines) of the riparian zone for three transects sampled at Allungra Creek (March 2015).  $\Delta^{13}\text{C}$  (left panels) and  $\text{WUE}_i$  (right panels) values for the dominant species sampled as a function of distance from the creek. Species at a given distance having the same letter indicates non-significant differences between species means (Tukey HSD, confidence level of 0.05).
